# Supplementary material
Source: PubMed Central journal article supplement (PMC5364311)
Supplement: IAI.01023-16_zii999091998s1.pdf [file IAI.01023-16_zii999091998s1.pdf]

| Peptide # | Rv #    | Residue # | Sequence         |
|-----------|---------|-----------|------------------|
| 1         | Rv0640  | 12-26     | KLQIVAGQANPAPPV  |
| 2         | Rv0640  | 67-81     | SFTFTLKTTPPAKLL  |
| 3         | Rv0651  | 68-82     | GLDELFVGPTAIAFV  |
| 4         | Rv0651  | 146-160   | KAAGLFNAPASQLAR  |
| 5         | Rv0652  | 30-44     | ETFEVTA AAPVAVAA |
| 6         | Rv0670  | 53-67     | IYVHAPY LINLASAN |
| 7         | Rv0670  | 221-235   | AAVKAAGAPVICETA  |
| 8         | Rv0672  | 11-25     | VPPLENYPASSPVL   |
| 9         | Rv0675  | 23-37     | SRNAVNGPTAAALCA  |
| 10        | Rv0675  | 64-78     | ADLKAFGTPEANSVH  |
| 11        | Rv0676c | 919-933   | LIVRSFMTPSIAALL  |
| 12        | Rv0688  | 387-401   | VRGKIAAGAPIAEVL  |
| 13        | Rv0691c | 48-62     | RTLFRYYASKNAIPW  |
| 14        | Rv0696  | 223-237   | PHSTVS YVPSAAIVC |
| 15        | Rv0696  | 293-307   | RKAFYGGSAAPLAVR  |
| 16        | Rv0701  | 25-39     | PVTVVKAGPNVVTRI  |
| 17        | Rv0706  | 45-59     | ILRWAPQAASGPVAK  |
| 18        | Rv0706  | 57-71     | VAKVIASAAANAQNN  |
| 19        | Rv0719  | 104-118   | LEFALGYSHPVVIEA  |
| 20        | Rv0725c | 112-126   | DARAYRLPWPAGTVV  |

**Table SI. Sequences and locations of peptides included in Pool 12.** The Mtb

(strain H37Rv) gene of origin, residue numbers and sequences are shown for each of the peptides within Pool 12 of the IKEPLUS peptide library (**Fig. 1D**).

A

**Ribosome Enrichment Protocol:**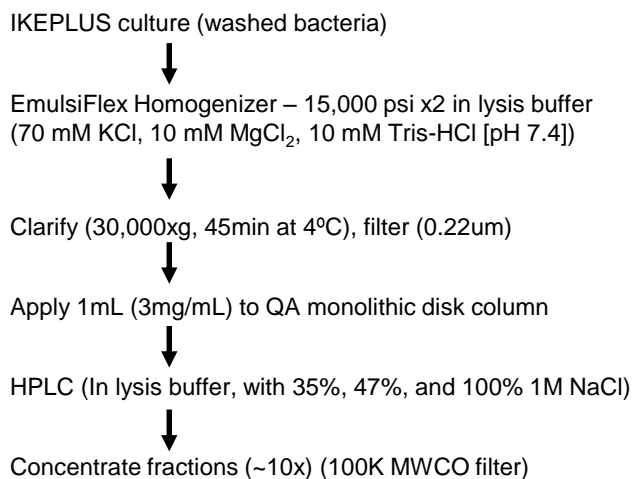

B

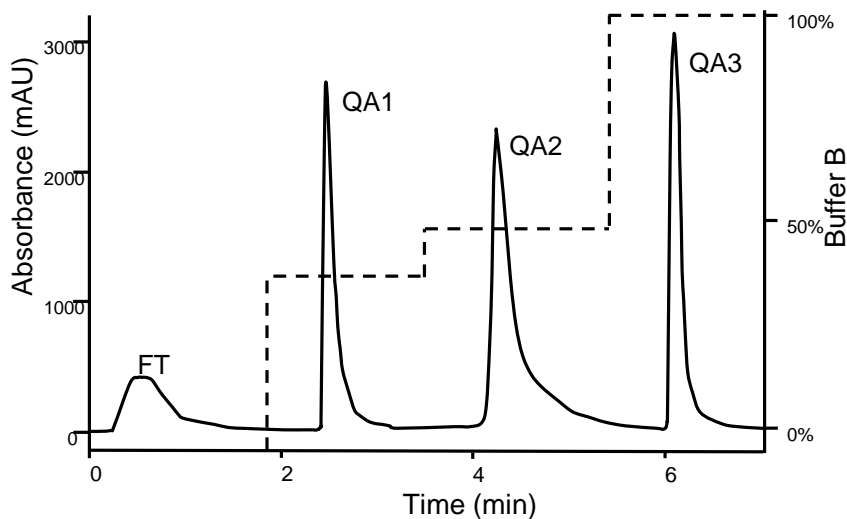

C

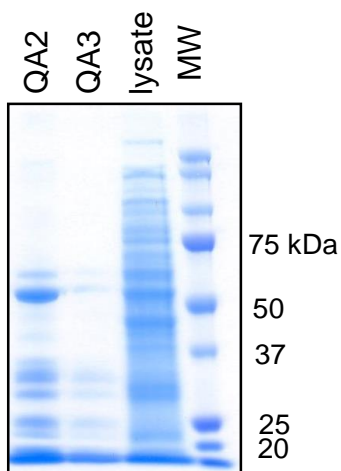

D

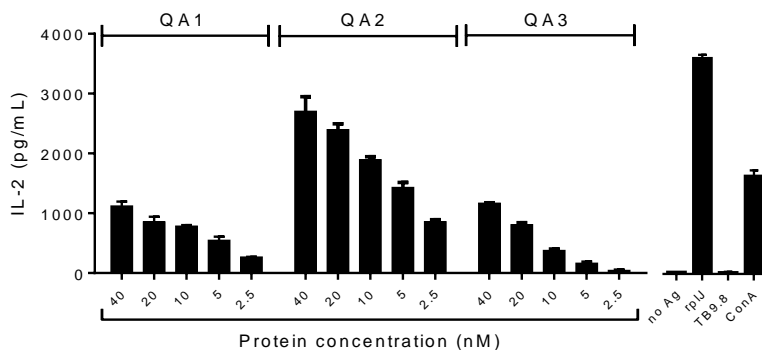

**Figure S1. Characterization of enriched ribosomes from IKEPLUS.**

(A) Schematic of the ribosome enrichment procedure used.

(B) Ribosomes were enriched from IKEPLUS using a standard HPLC ion exchange and size separation method. Isolations were performed at a flow rate of 2 mL/min, using lysis buffer (Buffer A) and lysis buffer containing 1M NaCl (Buffer B). Sequential elutions with 35% (fraction QA1), 47% (QA2), and 100% (QA3) buffer B were collected and further analyzed.

(C) Fractions QA2 and QA3, as well as IKEPLUS lysate, were also analyzed by SDS-PAGE and visualized with Coomassie blue staining.

(D) IL-2 ELISA was also used to examine fractions QA1, QA2, and QA3 for ribosomes by culturing the fractions in the presence of APCs and an rplJ<sub>TB146-160</sub>-specific TCH (clone RplJ.03).

Data are mean values and standard errors for duplicate samples.

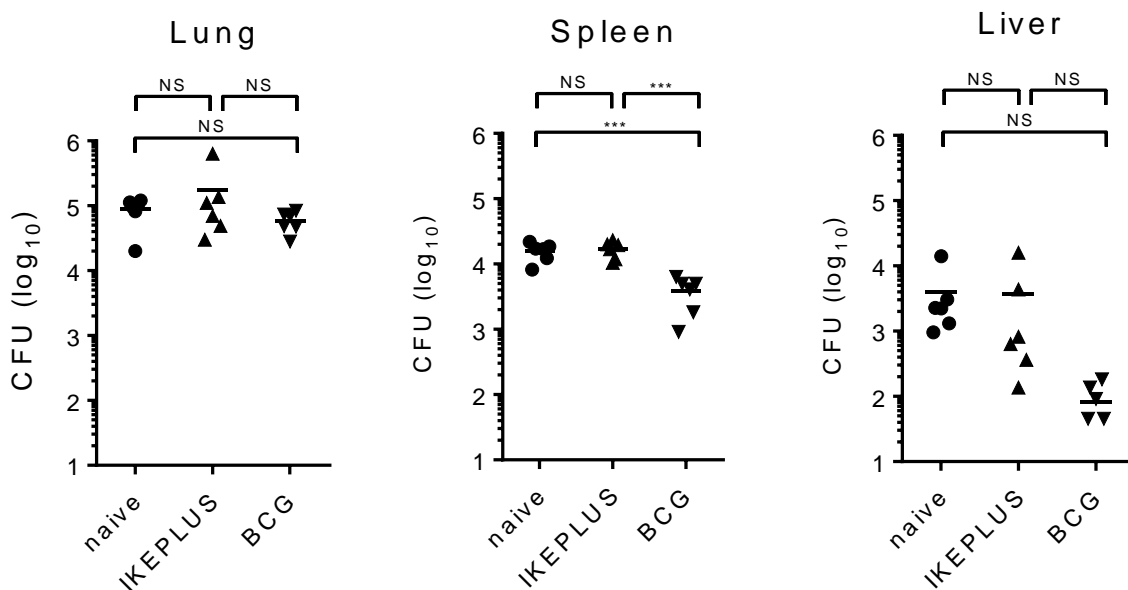

**Figure S2. Quantification of CFU in immunized mice following Mtb challenge.** Mice (C57BL/6) were immunized with  $5 \times 10^7$  CFU IKEPLUS i.v.,  $10^7$  CFU BCG-Danish s.c., or sham-immunized with saline s.c. (naïve). Ten weeks later, immunized and naïve mice were challenged with low-dose aerosol Mtb strain H37Rv (~100 CFU). Six weeks after challenge, lungs, spleens, and livers were harvested, processed, and quantified as previously described (60).

\*\*\* $p < 0.001$ , and \*\*\*\* $p < 0.0001$  (ANOVA).
